# Supplementary material for: Plasma proenkephalin A 119–159 on intensive care unit admission is a predictor of organ failure and 30-day mortality
Source: PubMed Central journal article supplement (PMC8286914; doi:10.1186/s40635-021-00396-6), 2021-07-19
Supplement: 40635_2021_396_MOESM1_ESM.pdf [file 40635_2021_396_MOESM1_ESM.pdf]

Table 1: **Descriptive statistics for the included and the excluded groups.** If not stated otherwise, values represent medians (inter quartile ranges, IQR). *ICU: intensive care unit, SAPS-3: simplified acute physiology score III, SOFA: Sequential Organ Failure Assessment.*

|                           | included      | excluded      | p-value |
|---------------------------|---------------|---------------|---------|
| Number of patients        | 1978          | 569           | <0.001  |
| Women (%)                 | 39            | 37            | 0.39    |
| Age (years)               | 66 (54-75)    | 62 (37-73)    | <0.001  |
| ICU length of stay (days) | 1.7 (0.8-3.8) | 1.1 (0.5-2.8) | <0.001  |
| ICU mortality (%)         | 11            | 13            | 0.29    |
| 30-day mortality (%)      | 22            | 24            | 0.19    |
| SAPS-3 score              | 59 (47-71)    | 54 (42-67)    | <0.001  |
| Day-two SOFA score        | 8 (5-10)      | 7 (4-9)       | 0.0081  |
| Sepsis (%)                | 36            | 23            | <0.001  |
| Cardiac arrest (%)        | 9.6           | 8.4           | 0.39    |
| Trauma (%)                | 7.9           | 12            | 0.0039  |
| No surgery (%)            | 74            | 75            | 0.81    |

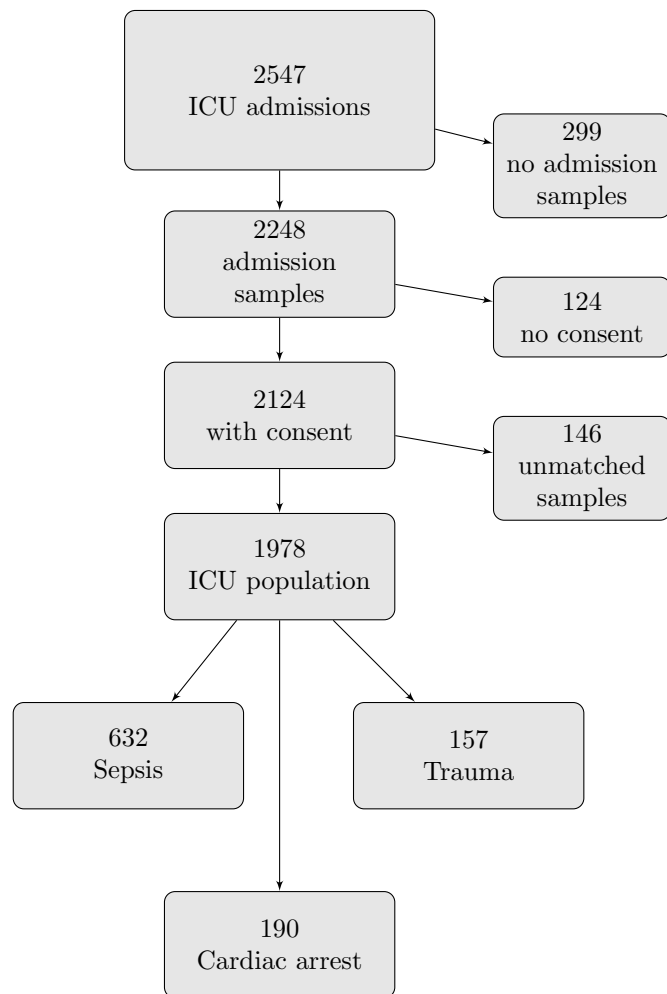

Figure 1: **Flow chart of ICU admissions, admission samples and consent.**

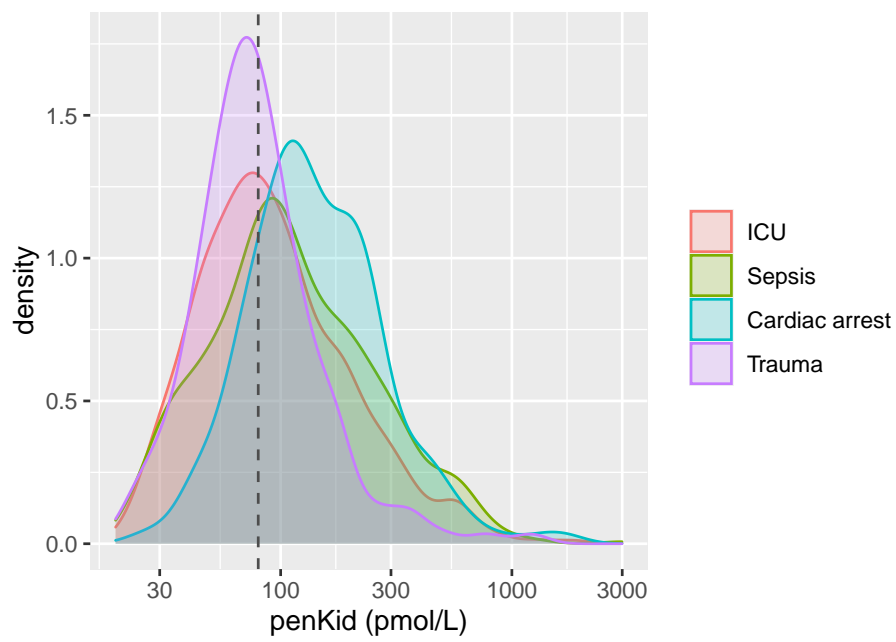

Figure 2: **Distribution of proenkephalin A 119-159 (penKid) levels** in the whole intensive care unit (ICU) population, in the subgroups sepsis, cardiac arrest and trauma. The vertical line at 80 pmol/L indicates the upper normal (99th percentile) limit.

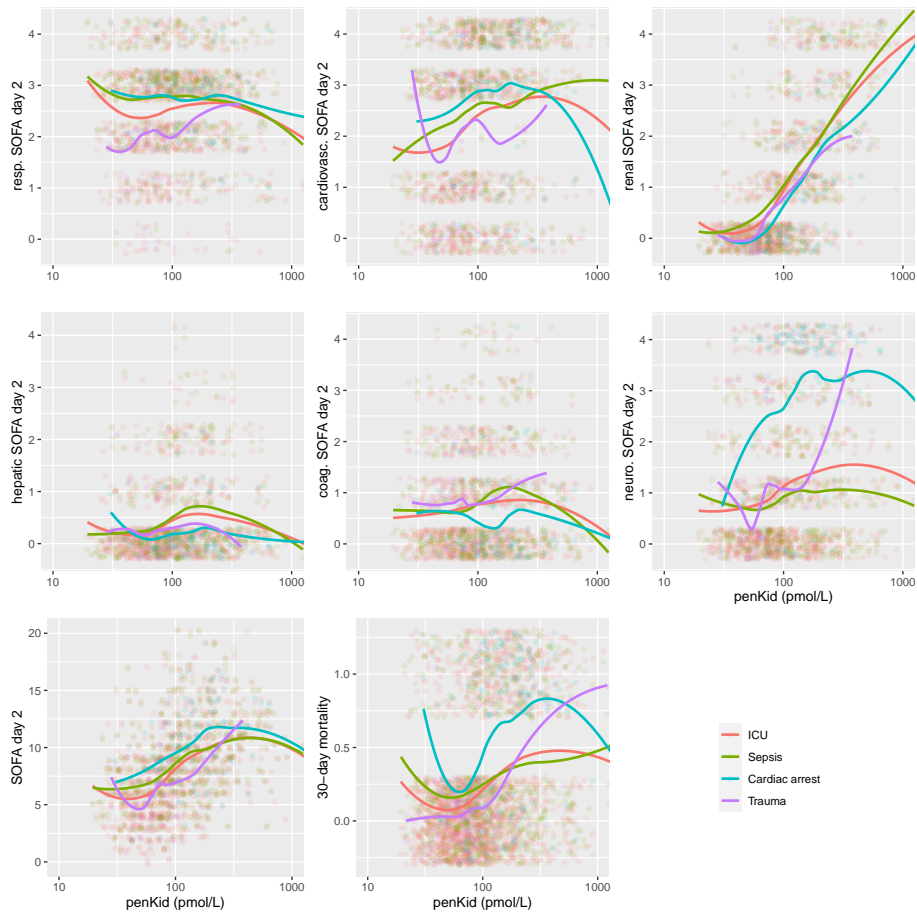

Figure 3: **Organ dysfunction on day two and 30-day mortality** in relation to admission proenkephalin A 119-159 (penKid) level. Individual patients are represented by the dots with added jitter. For mortality, this means that the y-values are in fact 0 and 1, representing 30-day survivors and 30-day non-survivors, respectively. For single-organ SOFA scores, the y-values are the integers from 0 to 4. The continuous lines represent smoothed averages. *SOFA*: *Sequential Organ Failure Assessment*, *ICU*: *intensive care unit*.

Table 2: **Missing data** for the whole ICU population. Variables not reported did not have any missing data. Box III refers to the corresponding section of the SAPS-3 scoring system. Lactate was only reported for patients with sepsis. *SOFA: Sequential Organ Failure Assessment, GCS: Glasgow coma scale,  $FiO_2$ : fraction of inspired oxygen,  $PaO_2$ : arterial partial pressure of oxygen.*

|                                 | Missing (%) |
|---------------------------------|-------------|
| Day-one SOFA score              | 16          |
| Day-two total SOFA score        | 49          |
| Day-two respiratory SOFA score  | 49          |
| Day-two renal SOFA score        | 50          |
| Day-two hepatic SOFA score      | 53          |
| Day-two neurological SOFA score | 49          |
| Day-two coagulation SOFA score  | 51          |
| <b>Box III</b>                  |             |
| GCS                             | 0           |
| Total bilirubin                 | 7           |
| Max. temperature                | 1           |
| Max. creatinine                 | 5           |
| Max. heart rate (bpm)           | 0.5         |
| Max. leukocyte count            | 6           |
| Min. pH                         | 4           |
| Min. platelet count             | 7           |
| Min. systolic blood pressure    | 1           |
| Oxygenation                     |             |
| - Respiratory support           | 12          |
| - $FiO_2$                       | 12          |
| - $PaO_2$ (kPa)                 | 49          |
| Lactate (% of sepsis subgroup)  | 1           |
